# Supplementary material for: Spaceflight induces changes in gene expression profiles linked to insulin and estrogen
Source: PubMed Central journal article supplement (PMC11166981; doi:10.1038/s42003-023-05213-2), 2024-06-11
Supplement: 42003_2023_5213_MOESM2_ESM.pdf [file 42003_2023_5213_MOESM2_ESM.pdf]

## **Supplemental Information**

**Spaceflight induces changes in gene expression profiles linked to insulin and estrogen**

**Supplementary Table 1.** List of analyzed tissues from the GeneLab database.

| Identifier              | Title                                                                                                                          | Authors, title, publisher, version, DOI                                                                                                                                                                                                                                                                                                                                       | Analyzed Tissue                  |
|-------------------------|--------------------------------------------------------------------------------------------------------------------------------|-------------------------------------------------------------------------------------------------------------------------------------------------------------------------------------------------------------------------------------------------------------------------------------------------------------------------------------------------------------------------------|----------------------------------|
| <a href="#">OSD-48</a>  | Rodent Research-1 (RR1) NASA Validation Flight: Mouse liver transcriptomic, proteomic, and epigenomic data                     | Globus R, Galazka J, Marcu O, Saravia-Butler A, Fogle H, Bense N, Chakravarty K, Lai Polo S, Chen R, Boyko V, Gebre S, Costes S. "Rodent Research-1 (RR1) NASA Validation Flight: Mouse liver transcriptomic, proteomic, and epigenomic data", NASA Open Science Data Repository, Version 10, <a href="http://doi.org/10.26030/iq04-0n5">http://doi.org/10.26030/iq04-0n5</a> | Liver                            |
| <a href="#">OSD-98</a>  | Rodent Research-1 (RR1) NASA Validation Flight: Mouse adrenal gland transcriptomic, proteomic, and epigenomic data             | Galazka J, Globus R. "Rodent Research-1 (RR1) NASA Validation Flight: Mouse adrenal gland transcriptomic, proteomic, and epigenomic data", NASA Open Science Data Repository, Version 7, <a href="http://doi.org/10.26030/n1jq-2364">http://doi.org/10.26030/n1jq-2364</a>                                                                                                    | Adrenal gland                    |
| <a href="#">OSD-99</a>  | Rodent Research-1 (RR1) NASA Validation Flight: Mouse extensor digitorum longus muscle transcriptomic and epigenomic data      | Galazka J, Globus R. "Rodent Research-1 (RR1) NASA Validation Flight: Mouse extensor digitorum longus muscle transcriptomic and epigenomic data", NASA Open Science Data Repository, Version 4, <a href="http://doi.org/10.26030/1h3m-3q49">http://doi.org/10.26030/1h3m-3q49</a>                                                                                             | Extensor digitorum longus muscle |
| <a href="#">OSD-100</a> | Rodent Research-1 (RR1) NASA Validation Flight: Mouse eye transcriptomic and epigenomic data                                   | Globus R, Galazka J. "Rodent Research-1 (RR1) NASA Validation Flight: Mouse eye transcriptomic and epigenomic data", NASA Open Science Data Repository, Version 4, <a href="http://doi.org/10.26030/whék-4p98">http://doi.org/10.26030/whék-4p98</a>                                                                                                                          | Eye                              |
| <a href="#">OSD-101</a> | Rodent Research-1 (RR1) NASA Validation Flight: Mouse left gastrocnemius muscle transcriptomic, proteomic, and epigenomic data | Galazka J, Globus R. "Rodent Research-1 (RR1) NASA Validation Flight: Mouse left gastrocnemius muscle transcriptomic, proteomic, and epigenomic data", NASA Open Science Data Repository, Version 5, <a href="http://doi.org/10.26030/sdmt-ae51">http://doi.org/10.26030/sdmt-ae51</a>                                                                                        | Gastrocnemius muscle             |
| <a href="#">OSD-102</a> | Rodent Research-1 (RR1) NASA Validation Flight: Mouse kidney transcriptomic, proteomic, and epigenomic data                    | Galazka J, Globus R. "Rodent Research-1 (RR1) NASA Validation Flight: Mouse kidney transcriptomic, proteomic, and epigenomic data", NASA Open Science Data Repository, Version 4, <a href="http://doi.org/10.26030/yn9m-2d19">http://doi.org/10.26030/yn9m-2d19</a>                                                                                                           | Kidney                           |
| <a href="#">OSD-103</a> | Rodent Research-1 (RR1) NASA Validation Flight: Mouse quadriceps muscle transcriptomic, proteomic, and epigenomic data         | Galazka J, Globus R. "Rodent Research-1 (RR1) NASA Validation Flight: Mouse quadriceps muscle transcriptomic, proteomic, and epigenomic data", NASA Open Science Data Repository, Version 4, <a href="http://doi.org/10.26030/9vzk-b116">http://doi.org/10.26030/9vzk-b116</a>                                                                                                | Quadriceps muscle                |

| Identifier              | Title                                                                                                                         | Authors, title, publisher, version, DOI                                                                                                                                                                                                                                                                               | Analyzed Tissue          |
|-------------------------|-------------------------------------------------------------------------------------------------------------------------------|-----------------------------------------------------------------------------------------------------------------------------------------------------------------------------------------------------------------------------------------------------------------------------------------------------------------------|--------------------------|
| <a href="#">OSD-104</a> | Rodent Research-1 (RR1) NASA Validation Flight: Mouse soleus muscle transcriptomic and epigenomic data                        | Galazka J, Globus R. "Rodent Research-1 (RR1) NASA Validation Flight: Mouse soleus muscle transcriptomic and epigenomic data", NASA Open Science Data Repository, Version 4, <a href="http://doi.org/10.26030/em9r-w619">http://doi.org/10.26030/em9r-w619</a>                                                        | Soleus muscle            |
| <a href="#">OSD-105</a> | Rodent Research-1 (RR1) NASA Validation Flight: Mouse tibialis anterior muscle transcriptomic, proteomic, and epigenomic data | Galazka J, Globus R. "Rodent Research-1 (RR1) NASA Validation Flight: Mouse tibialis anterior muscle transcriptomic, proteomic, and epigenomic data", NASA Open Science Data Repository, Version 4, <a href="http://doi.org/10.26030/xgw6-6t64">http://doi.org/10.26030/xgw6-6t64</a>                                 | Tibialis anterior muscle |
| <a href="#">OSD-168</a> | RR-1 and RR-3 mouse liver transcriptomics with and without ERCC control RNA spike-ins                                         | Galazka J. "RR-1 and RR-3 mouse liver transcriptomics with and without ERCC control RNA spike-ins", NASA Open Science Data Repository, Version 10, <a href="http://doi.org/10.26030/rwyp-9325">http://doi.org/10.26030/rwyp-9325</a>                                                                                  | Liver                    |
| <a href="#">OSD-238</a> | Transcriptomic analysis of dorsal skin from mice flown on the MHU-2 mission                                                   | Ohno H, Galazka J, Lai Polo S, Saravia-Butler A, Fogle H, Boyko V, Dinh M, Costes S, Gebre S. "Transcriptomic analysis of dorsal skin from mice flown on the MHU-2 mission", NASA Open Science Data Repository, Version 7, <a href="http://doi.org/10.26030/cdv4-tn30">http://doi.org/10.26030/cdv4-tn30</a>          | Dorsal skin              |
| <a href="#">OSD-239</a> | Transcriptomic analysis of femoral skin from mice flown on the MHU-2 mission                                                  | Ohno H, Galazka J, Lai Polo S, Saravia-Butler A, Fogle H, Boyko V, Dinh M, Costes S, Gebre S. "Transcriptomic analysis of femoral skin from mice flown on the MHU-2 mission", NASA Open Science Data Repository, Version 7, <a href="http://doi.org/10.26030/s7k9-7958">http://doi.org/10.26030/s7k9-7958</a>         | Femoral skin             |
| <a href="#">OSD-240</a> | Transcriptional analysis of dorsal skin from mice flown on the RR-5 mission                                                   | Galazka J, Soo C, Lai Polo S, Saravia-Butler A, Fogle H, Bense N, Boyko V, Dinh M, Costes S, Gebre S. "Transcriptional analysis of dorsal skin from mice flown on the RR-5 mission", NASA Open Science Data Repository, Version 8, <a href="http://doi.org/10.26030/6eq2-wz66">http://doi.org/10.26030/6eq2-wz66</a>  | Dorsal skin              |
| <a href="#">OSD-241</a> | Transcriptional analysis of femoral skin from mice flown on the RR-5 mission                                                  | Galazka J, Soo C, Lai Polo S, Saravia-Butler A, Fogle H, Bense N, Boyko V, Dinh M, Costes S, Gebre S. "Transcriptional analysis of femoral skin from mice flown on the RR-5 mission", NASA Open Science Data Repository, Version 8, <a href="http://doi.org/10.26030/gfsz-c144">http://doi.org/10.26030/gfsz-c144</a> | Femoral skin             |

| Identifier              | Title                                                                                                          | Authors, title, publisher, version, DOI                                                                                                                                                                                                                                                                        | Analyzed Tissue |
|-------------------------|----------------------------------------------------------------------------------------------------------------|----------------------------------------------------------------------------------------------------------------------------------------------------------------------------------------------------------------------------------------------------------------------------------------------------------------|-----------------|
| <a href="#">OSD-254</a> | Transcriptional analysis of dorsal skin from mice flown on the RR-7 mission                                    | Galazka J, Lai Polo S, Saravia-Butler A, Fogle H, Bense N, Boyko V, Chen Y, Costes S, Gebre S. "Transcriptional analysis of dorsal skin from mice flown on the RR-7 mission", NASA Open Science Data Repository, Version 13, <a href="http://doi.org/10.26030/dcq8-6c70">http://doi.org/10.26030/dcq8-6c70</a> | Dorsal skin     |
| <a href="#">OSD-530</a> | Cell-free RNA analysis of plasma samples collected from six astronauts in JAXA Cell-Free Epigenome (CFE) Study | Muratani M. "Cell-free RNA analysis of plasma samples collected from six astronauts in JAXA Cell-Free Epigenome (CFE) Study", NASA Open Science Data Repository, Version 1, <a href="http://doi.org/10.26030/r2xr-h714">http://doi.org/10.26030/r2xr-h714</a>                                                  | Plasma          |

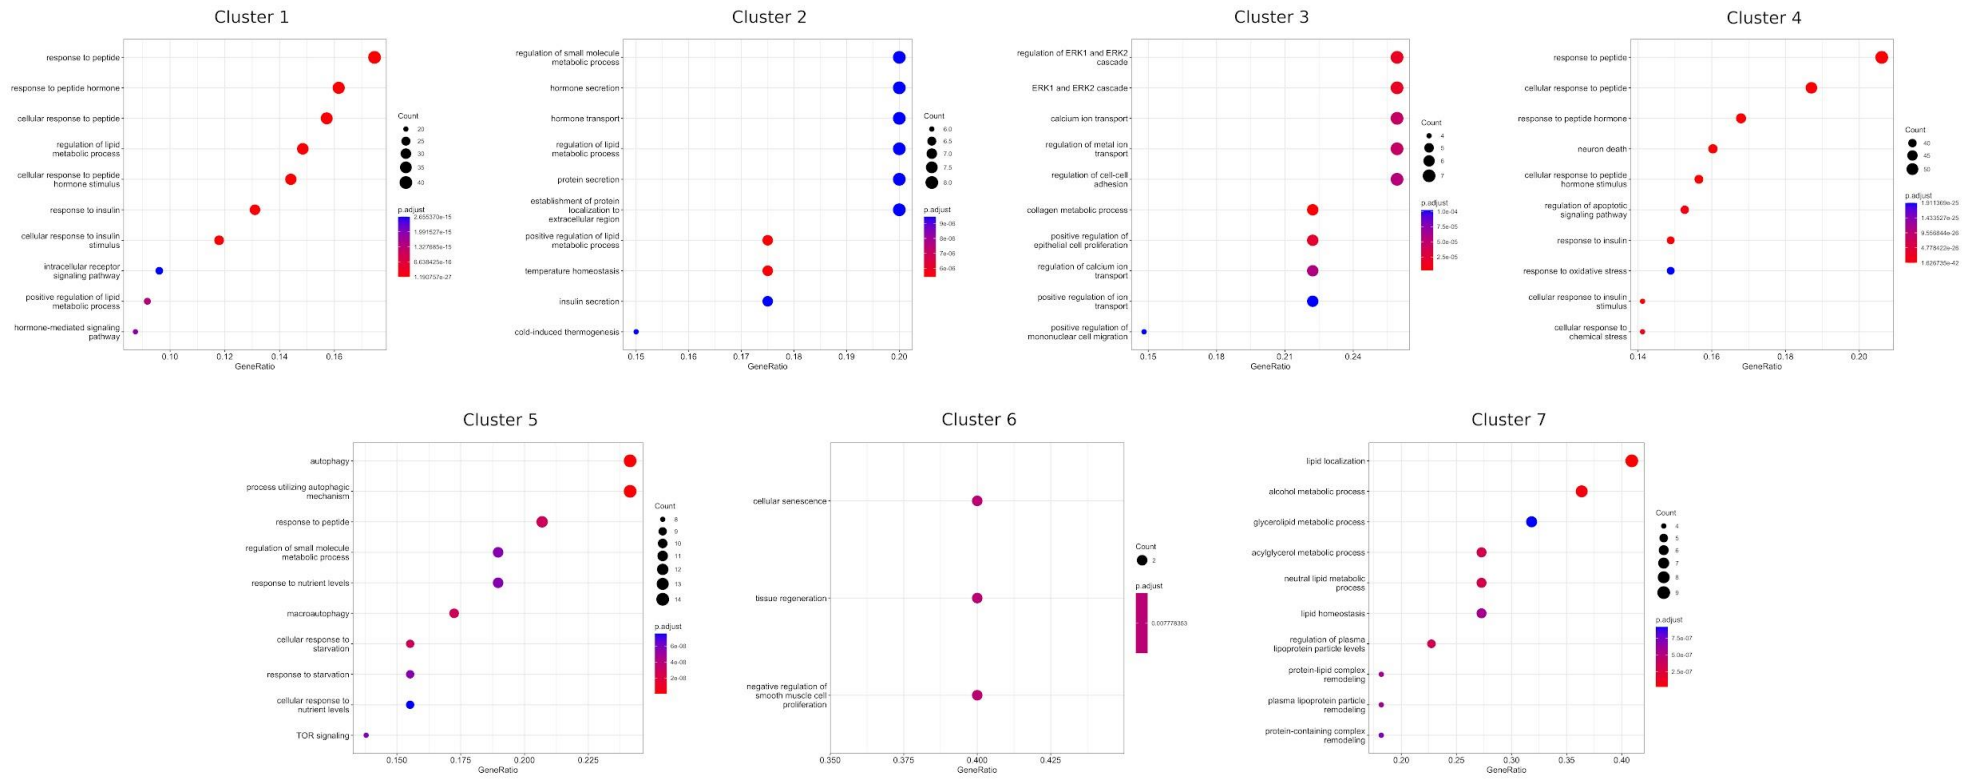

**Supplementary Figure 1.** Enriched GO processes for each of the seven clusters related to insulin signaling and insulin resistance from **Fig 1D**.
