# Supplementary material for: Spaceflight induces changes in gene expression profiles linked to insulin and estrogen
Source: PubMed Central journal article supplement (PMC11166981; doi:10.1038/s42003-023-05213-2), 2024-06-11
Supplement: 42003_2023_5213_MOESM3_ESM.pdf [file 42003_2023_5213_MOESM3_ESM.pdf]

## **Description of Additional Supplementary Files**

**File name:** Supplementary Data 1

**Description:** Significant genes in insulin signaling between EDL and Soleus muscles.
