# Supplementary material for: Spaceflight induces changes in gene expression profiles linked to insulin and estrogen
Source: Commun Biol. 2024 Jun 11;7:692. doi: 10.1038/s42003-023-05213-2 (PMC11166981; doi:10.1038/s42003-023-05213-2)
Supplement: Supplementary file 4 — Supplementary Data 1 [file 42003_2023_5213_MOESM4_ESM.xlsx]

## Sheet: Sheet1
Symbol	Entrez Gene Name	Log2FC Flight vs Control	Log2FC Flight vs Control
		EDL	Soleus
ACVR2B	activin A receptor type 2B	-0.397	0.598
ADAMTS5	ADAM metallopeptidase with thrombospondin type 1 motif 5	0.342	0.572
ADAMTS9	ADAM metallopeptidase with thrombospondin type 1 motif 9	0.97	-0.638
ADAR	adenosine deaminase RNA specific	0.336	0.367
ADRA2A	adrenoceptor alpha 2A	-0.831	0.637
APLN	apelin	1.687	0.561
ARC	activity regulated cytoskeleton associated protein	1.166	-1.894
ARNTL	aryl hydrocarbon receptor nuclear translocator like	0.927	0.476
ASIC1	acid sensing ion channel subunit 1	1.553	2.725
ATP6AP2	ATPase H+ transporting accessory protein 2	0.404	-0.691
BHLHE40	basic helix-loop-helix family member e40	-0.492	-0.283
Bhlhe41	basic helix-loop-helix family, member e41	-0.533	-0.906
BMP7	bone morphogenetic protein 7	-0.545	0.72
BNIP3	BCL2 interacting protein 3	0.29	-0.63
CA2	carbonic anhydrase 2	-0.321	-0.314
CAMK2A	calcium/calmodulin dependent protein kinase II alpha	-0.276	0.525
CAMK2G	calcium/calmodulin dependent protein kinase II gamma	-0.398	0.463
CCN2	cellular communication network factor 2	0.974	-0.691
CCND1	cyclin D1	1.014	-0.688
CDKN1A	cyclin dependent kinase inhibitor 1A	1.322	0.744
CES1	carboxylesterase 1	-0.864	0.661
CLU	clusterin	-0.42	0.409
CMKLR1	chemerin chemokine-like receptor 1	0.353	-0.361
CREM	cAMP responsive element modulator	0.352	-0.677
CRHR2	corticotropin releasing hormone receptor 2	0.382	0.649
CRY1	cryptochrome circadian regulator 1	0.605	0.64
CRY2	cryptochrome circadian regulator 2	-0.339	-0.628
CTH	cystathionine gamma-lyase	-0.496	-1.11
CXCL14	C-X-C motif chemokine ligand 14	0.265	-0.634
DBP	D-box binding PAR bZIP transcription factor	-1.79	-1.707
DEPTOR	DEP domain containing MTOR interacting protein	-0.502	0.405
DLK1	delta like non-canonical Notch ligand 1	-0.95	1.801
DMPK	DM1 protein kinase	-0.269	-0.273
DUSP1	dual specificity phosphatase 1	0.889	-0.27
DYRK1B	dual specificity tyrosine phosphorylation regulated kinase 1B	-0.331	0.278
EGLN3	egl-9 family hypoxia inducible factor 3	1.374	0.353
EGR1	early growth response 1	1.882	-1.767
ENHO	energy homeostasis associated	0.787	0.885
ESRRG	estrogen related receptor gamma	0.859	-0.955
F2RL1	F2R like trypsin receptor 1	0.9	-1.323
F3	coagulation factor III, tissue factor	0.373	-0.531
FLCN	folliculin	-0.364	-0.425
FNDC5	fibronectin type III domain containing 5	0.705	-0.494
GCK	glucokinase	1.65	-1.984
GPR4	G protein-coupled receptor 4	0.602	-0.51
GRB14	growth factor receptor bound protein 14	0.38	0.478
HDAC4	histone deacetylase 4	-0.275	0.272
HSPA1A/HSPA1B	heat shock protein family A (Hsp70) member 1A	1.49	-0.464
IDH2	isocitrate dehydrogenase (NADP(+)) 2	0.299	-1.22
IGF1	insulin like growth factor 1	0.362	0.462
IRF7	interferon regulatory factor 7	1.169	1.057
ITGB1	integrin subunit beta 1	0.324	-0.29
ITGB5	integrin subunit beta 5	-0.413	-0.389
KCNMA1	potassium calcium-activated channel subfamily M alpha 1	0.655	-0.363
KLF10	Kruppel like factor 10	-0.723	1.025
KSR1	kinase suppressor of ras 1	-0.471	0.651
MAF	MAF bZIP transcription factor	-0.325	1.176
METRNL	meteorin like, glial cell differentiation regulator	0.662	-0.615
Mt1	metallothionein 1	1.298	0.822
NCAM1	neural cell adhesion molecule 1	0.924	-0.887
Nes	nestin	0.699	-1.205
NRIP1	nuclear receptor interacting protein 1	-0.298	0.452
NUAK1	NUAK family kinase 1	0.422	-0.974
OPN3	opsin 3	0.996	-1.429
PER2	period circadian regulator 2	-1.609	-1.103
PIK3CD	phosphatidylinositol-4,5-bisphosphate 3-kinase catalytic subunit delta	-0.58	0.527
PIK3R3	phosphoinositide-3-kinase regulatory subunit 3	0.37	-0.392
PLCD4	phospholipase C delta 4	-0.389	1.535
PLCL1	phospholipase C like 1 (inactive)	-0.331	0.768
PPP1R1A	protein phosphatase 1 regulatory inhibitor subunit 1A	-0.347	0.746
PPP2CA	protein phosphatase 2 catalytic subunit alpha	0.331	-0.274
PTCH1	patched 1	-0.398	0.33
RAB31	RAB31, member RAS oncogene family	0.428	-0.426
RGCC	regulator of cell cycle	1.013	-1.272
RORA	RAR related orphan receptor A	-0.373	0.45
SESN3	sestrin 3	0.364	-0.44
SETD7	SET domain containing 7, histone lysine methyltransferase	-0.465	0.322
SMTNL1	smoothelin like 1	0.79	0.479
SORBS1	sorbin and SH3 domain containing 1	0.57	-0.541
SOX4	SRY-box transcription factor 4	0.976	0.421
SOX6	SRY-box transcription factor 6	-0.283	0.5
SOX9	SRY-box transcription factor 9	0.399	-1.868
SPHK1	sphingosine kinase 1	0.757	-1.725
SREBF1	sterol regulatory element binding transcription factor 1	0.355	0.667
STARD10	StAR related lipid transfer domain containing 10	-0.264	-0.302
STAT5A	signal transducer and activator of transcription 5A	-0.263	0.919
STAT5B	signal transducer and activator of transcription 5B	-0.557	0.993
TGFB1	transforming growth factor beta 1	0.666	-0.435
THBS1	thrombospondin 1	1.267	-0.833
TLR4	toll like receptor 4	0.366	-0.51
TP63	tumor protein p63	0.435	0.947
TRAF3	TNF receptor associated factor 3	0.324	-0.668
TRIB3	tribbles pseudokinase 3	1.062	-1.229
TRIM13	tripartite motif containing 13	0.282	0.273
UCHL1	ubiquitin C-terminal hydrolase L1	0.566	-1.624
UCP2	uncoupling protein 2	0.42	-0.568
VTN	vitronectin	0.364	0.276
WFS1	wolframin ER transmembrane glycoprotein	0.568	-0.444
